# Supplementary material for: A Liquid Biopsy-Based Approach for Monitoring Treatment Response in Post-Operative Colorectal Cancer Patients
Source: MDPI journal article supplement (doi:10.3390/ijms23073774), 2022-03-29
Supplement: s1 [file s1]

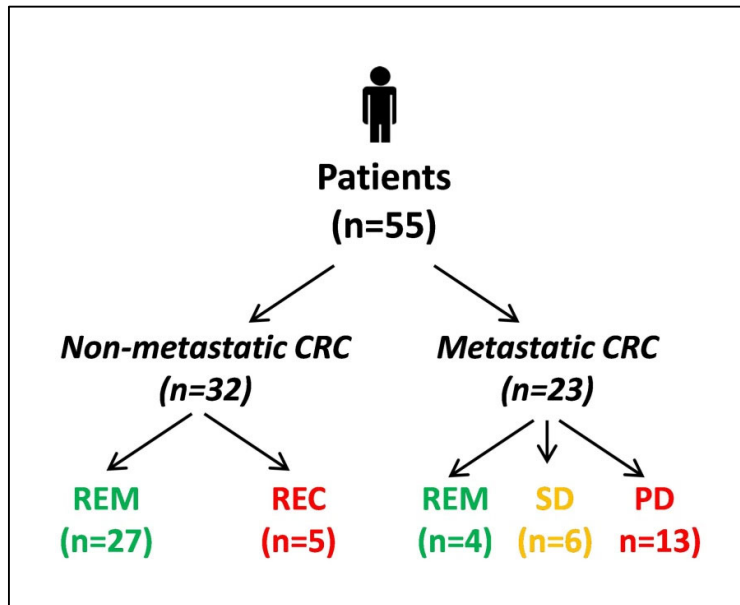

**Supplementary Figure S1.** Patient distribution. The CRC patients were grouped based on the disease outcome. REM: remission; REC: recurrence; SD: stable disease; PD: progressive disease.
