# Supplementary material for: A Liquid Biopsy-Based Approach for Monitoring Treatment Response in Post-Operative Colorectal Cancer Patients
Source: MDPI journal article supplement (doi:10.3390/ijms23073774), 2022-03-29
Supplement: s1 [file s1]

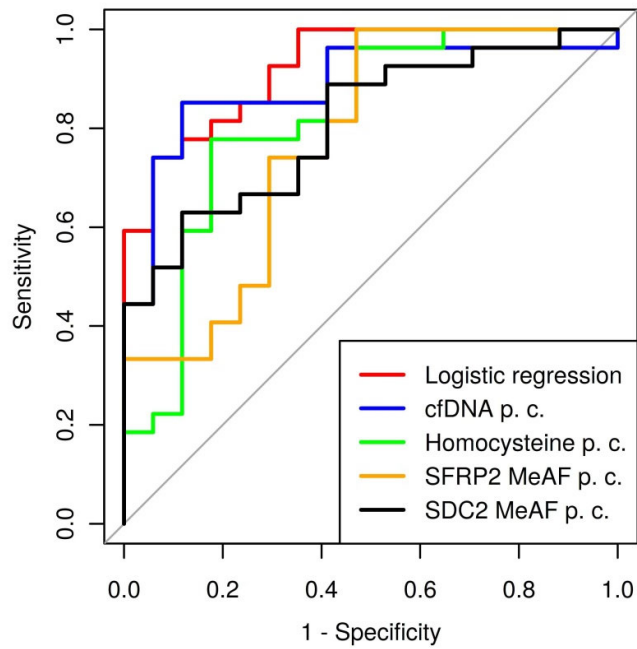

**Supplementary Figure S2.** ROC curve analyses of logistic regression and selected parameters separately (percentage changes of cfDNA, homocysteine, SFRP2, and SDC2 methylation). The highest AUC (0.924) was for the logistic regression followed by the other markers with 0.887, 0.815, 0.776, and 0.808, respectively. p.c.: percentage change, MeAF: methylation allele frequency.
